# Supplementary material for: Ice-Nucleating Particles Near Two Major Dust Source Regions
Source: Copernicus journal article supplement (doi:10.5194/acp-2021-1101), 2022-02-14

## SUPPLEMENTARY FIGURES AND TABLES LEGEND

**Supplementary Figure 1.** Locations where each aerosol sample was collected during Leg 1 (Malta to Kuwait).

**Supplementary Figure 2.** Locations where each aerosol sample was collected during Leg 2 (Kuwait to Toulon).

**Supplementary Figure 3.** Time series of dust concentrations estimated from the Ca+ concentrations measured in the water-soluble fraction of total suspended particles. Red markers show where hourly composition data was linearly interpolated for four samples where data was partially missing (samples f020, f025, f036 and f037).

**Supplementary Figure 4.** Aerosol sampling set-up on the RV *Kommandor Iona* wheelhouse top.

**Supplementary Figure 5.** INP concentrations measured in 8 aerosol samples from which a dilution was performed (10-100X). The  $n_{INP}$  spectra from both the original suspension and the dilution are shown (see Methods Sec 2.4).

**Supplementary Figure 6.** INP concentrations measured in 26 aerosol samples collected during AQABA and in simulated INP concentrations from 7 blank filter samples. The simulated blank filter INP concentrations were estimated for the mean volume sampled during AQABA (6680 L, see Methods Sec 2.4). The freezing onset temperatures detected in 6 of the 7 field blanks ranged between -15 and -27 °C, with the exception of one field blank sample in which a single freezing event was detected at a relatively higher temperature -6 °C. This indicates the presence of a rare contaminant with a high freezing temperature from sampling handling processes, as this single freezing event represented 1/255 of total detected field blank freezing events. The INP concentrations measured in one aerosol sample (f033) fell within the range of background INP levels present in field blanks.

**Supplementary Figure 7.** Linear regressions between total aerosol surface area and concentrations of INPs with freezing temperatures between -10 and -20 °C. Results show little to no correlation between INP concentrations and total aerosol surface area.  $R^2$  and  $p$  values are also reported for each temperature. Shaded region is the 95% confidence interval for the best fit linear regression. Marker colors indicate the average ambient dust mass concentration during the sampling period. Dilutions of 8 filter samples are included in the regression analysis (Fig. S5).

**Supplementary Figure 8.** Aerosol 72-hour back trajectories for Leg 1 simulated by FLEXPART (Methods Sec. 2.5).

**Supplementary Figure 9.** Aerosol 72-hour back trajectories for Leg 2 simulated by FLEXPART (Methods Sec. 2.5). Sample f033 marked with an X to indicate no INPs detected at -15 °C.

**Supplementary Figure 10.** Map of the collection locations of 10 subsurface seawater (SSW) samples. Marker sizes indicate abundance of INPs.

**Supplementary Figure 11.** Average ocean surface chlorophyll *a* concentration from 1 August to 31 August 2017 (Moderate Resolution Imaging Spectroradiometre, <https://oceandata.sci.gsfc.nasa.gov/MODIS-Aqua>).

**Supplementary Figure 12.** Measured concentrations of INPs in SSW samples that were treated with heat, hydrogen peroxide and a 0.2  $\mu\text{m}$  filter (Methods Sec. 2.4). Results indicate the presence of organic, heat-labile and heat-stable INPs, and an abundance of INPs both larger and smaller than 0.2  $\mu\text{m}$ .

Figure S1

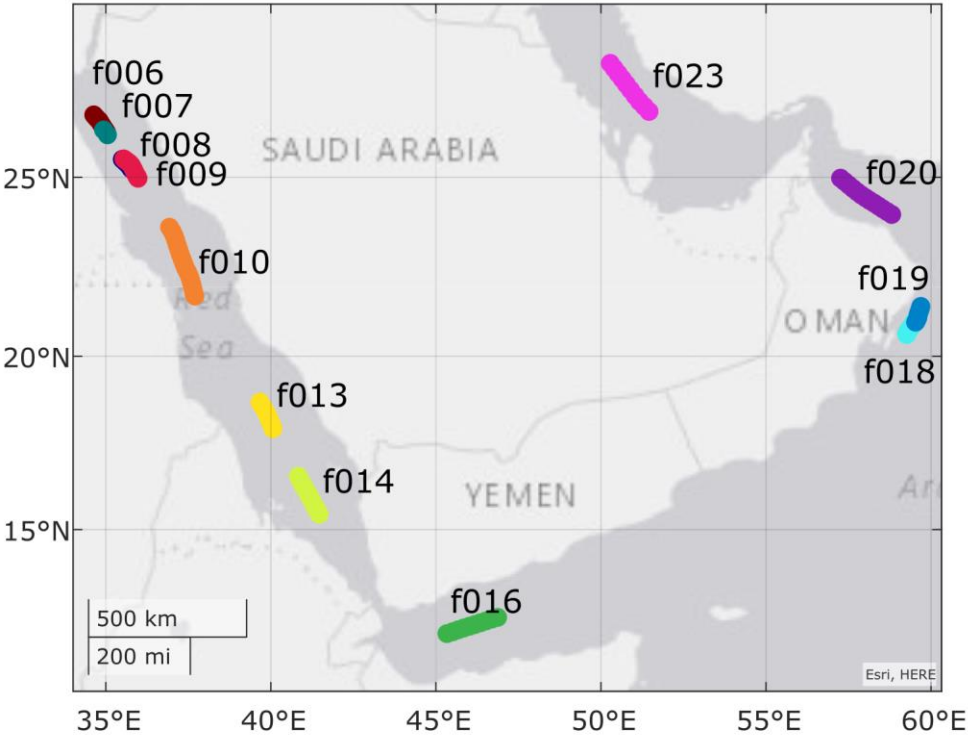

Figure S2

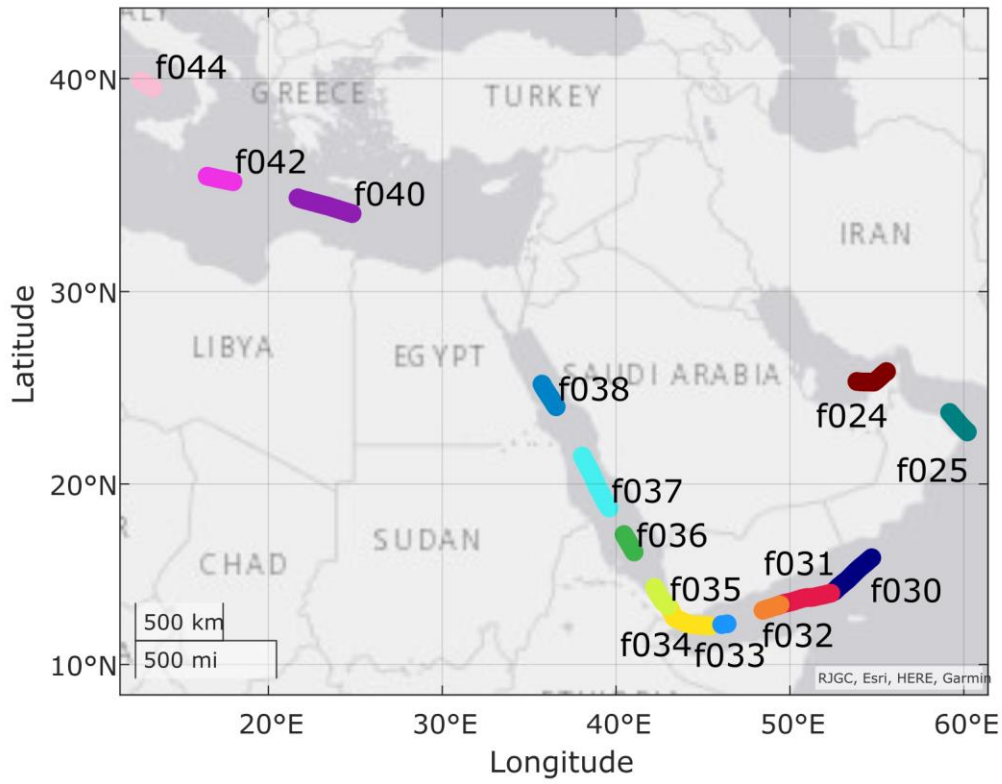

Figure S3

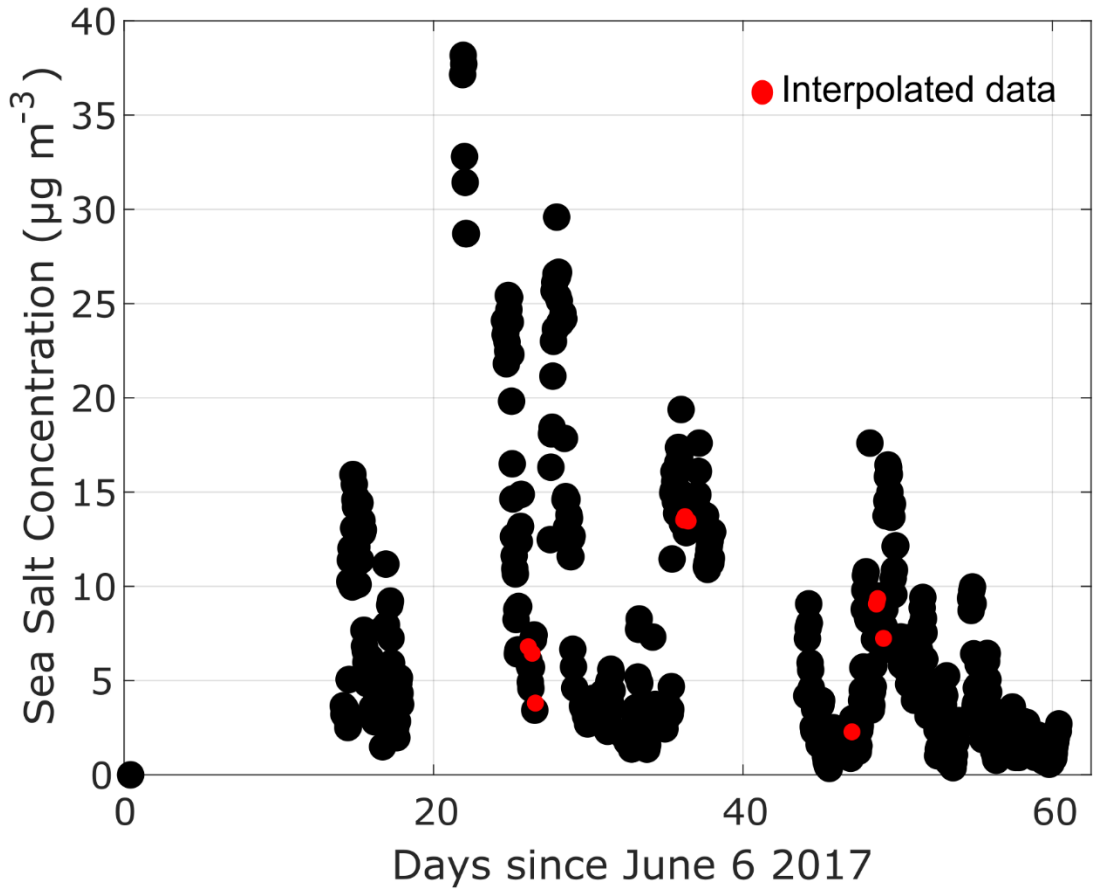

Figure S4

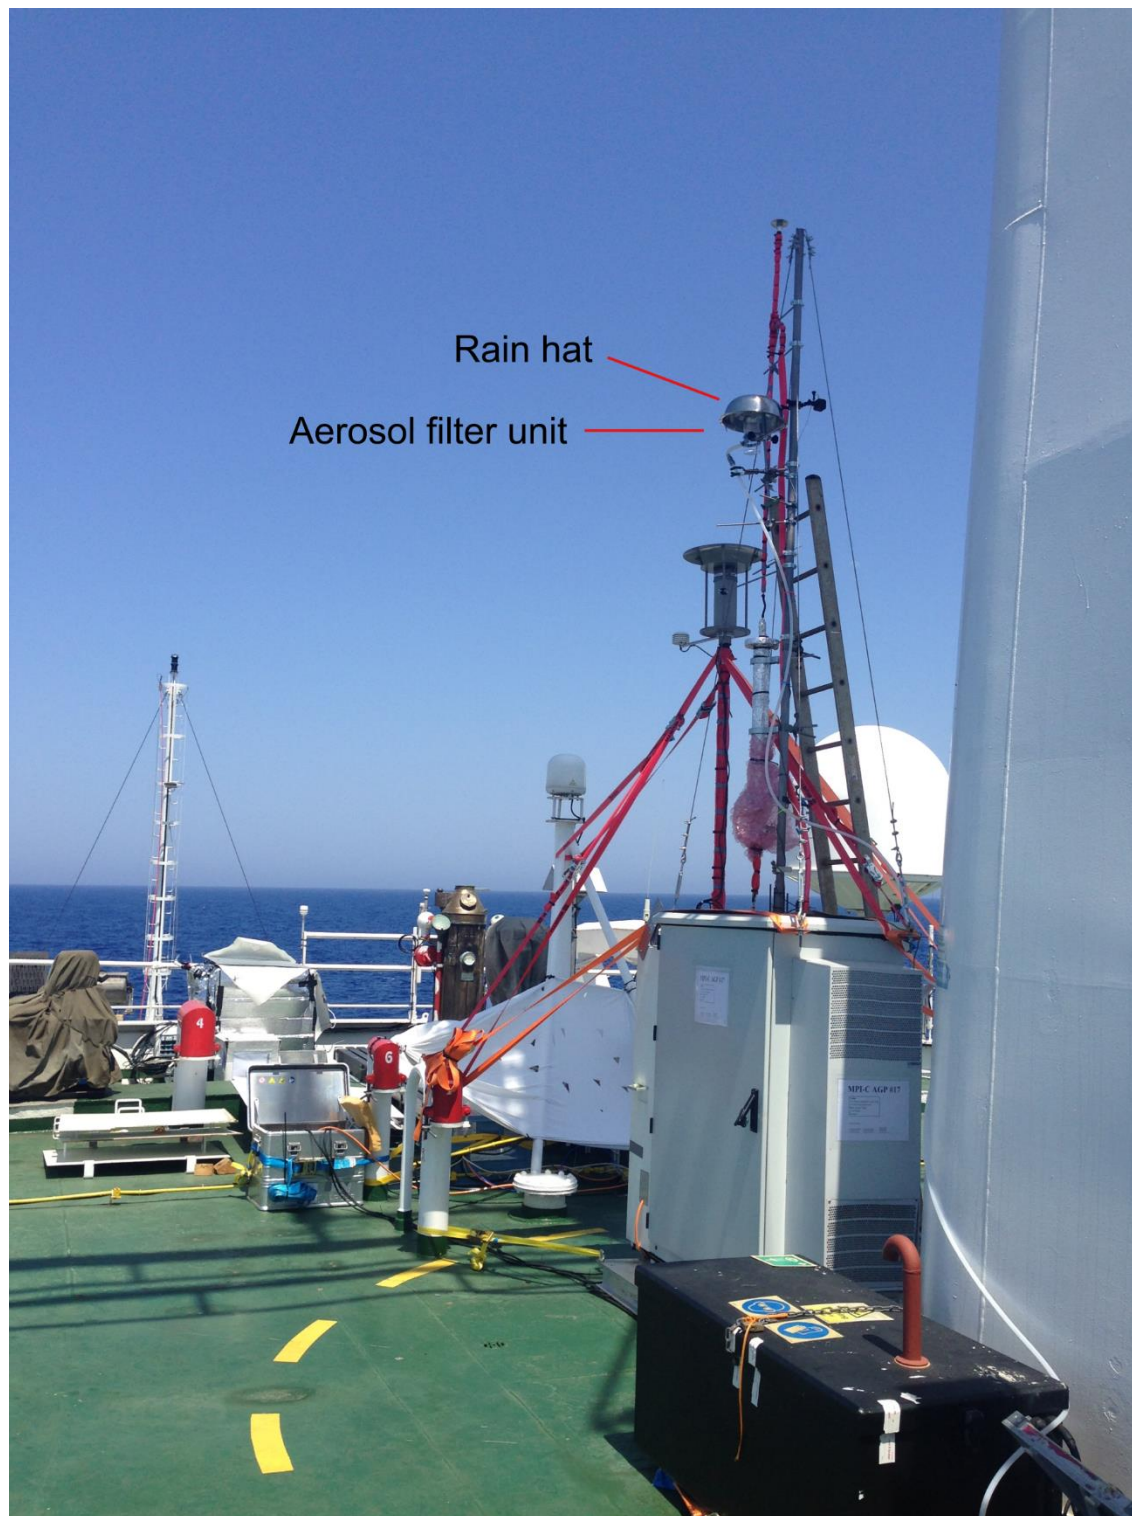

Figure S5

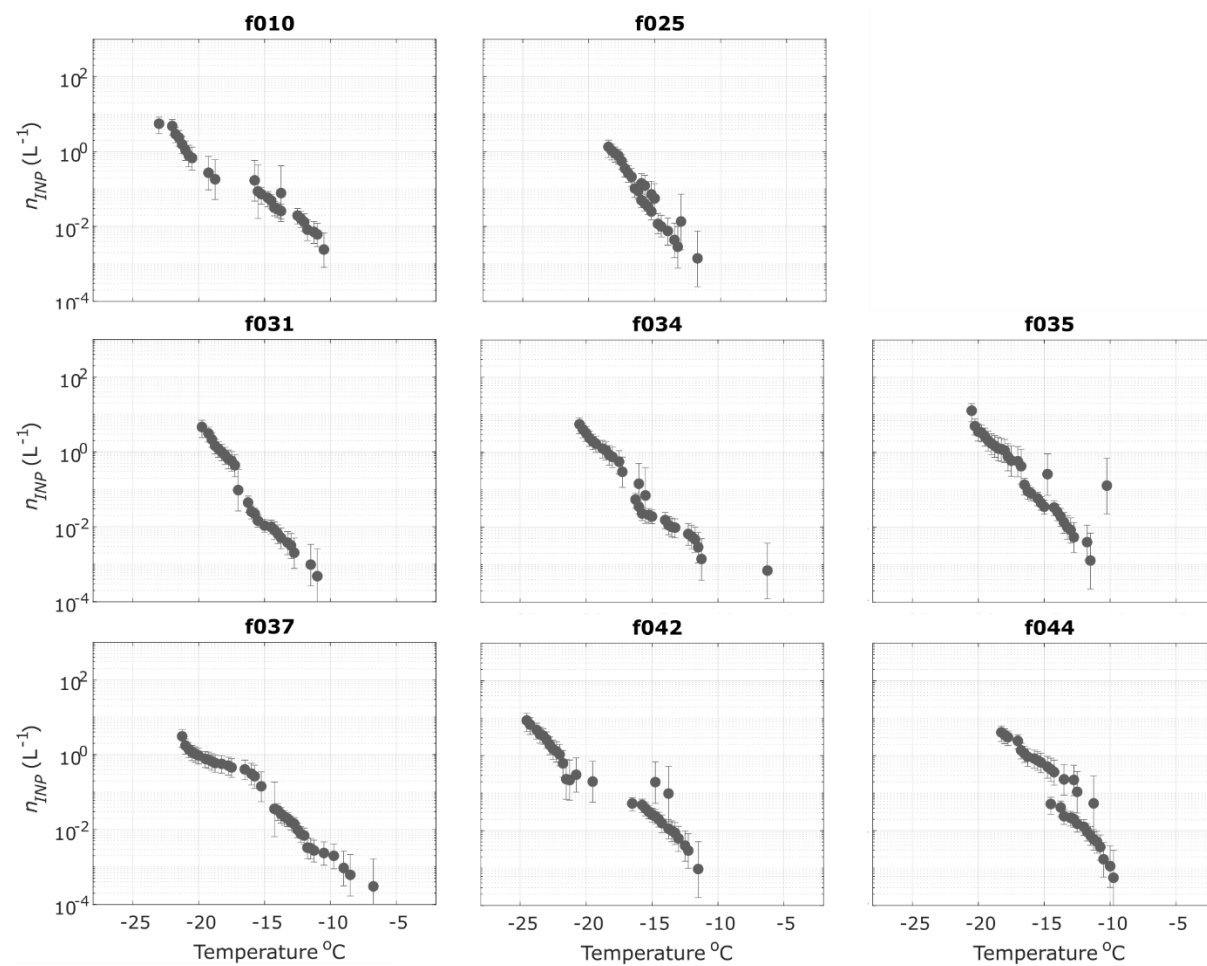

Figure S6

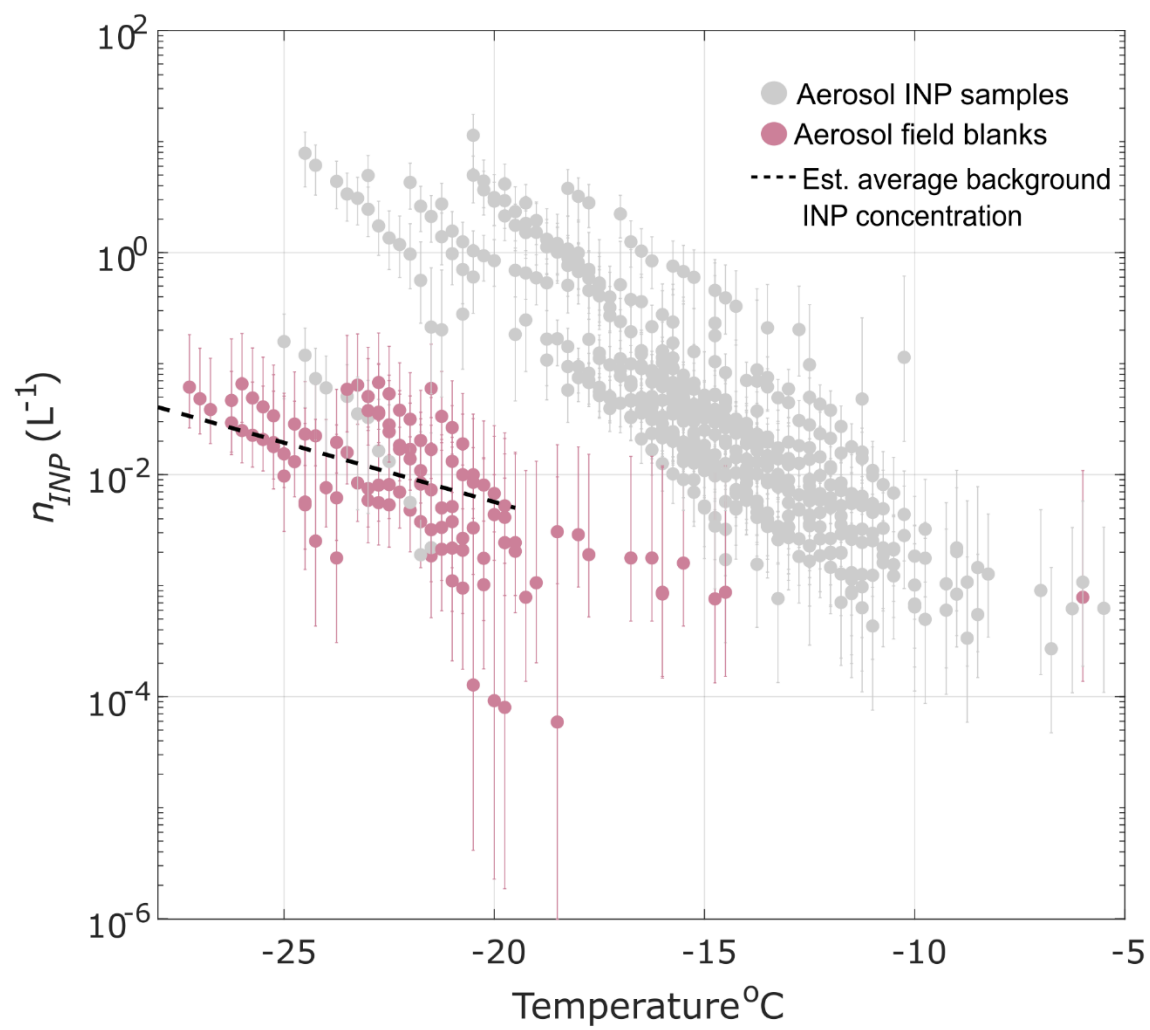



Figure S7

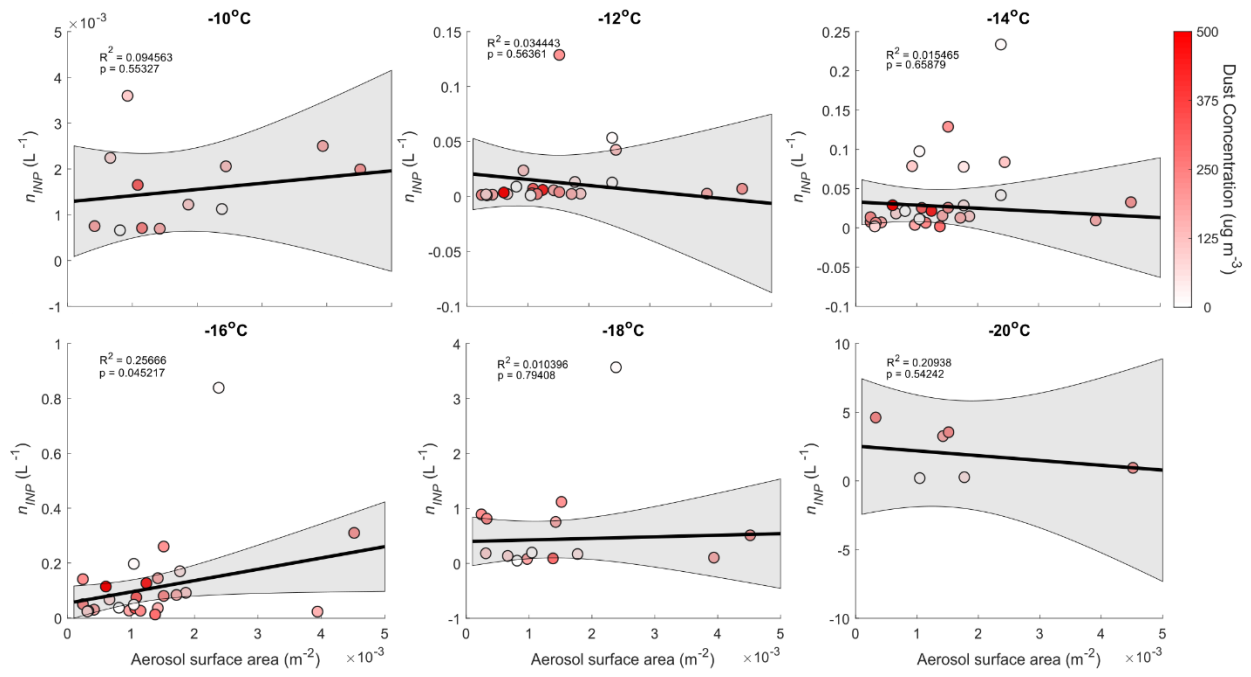

Figure S8

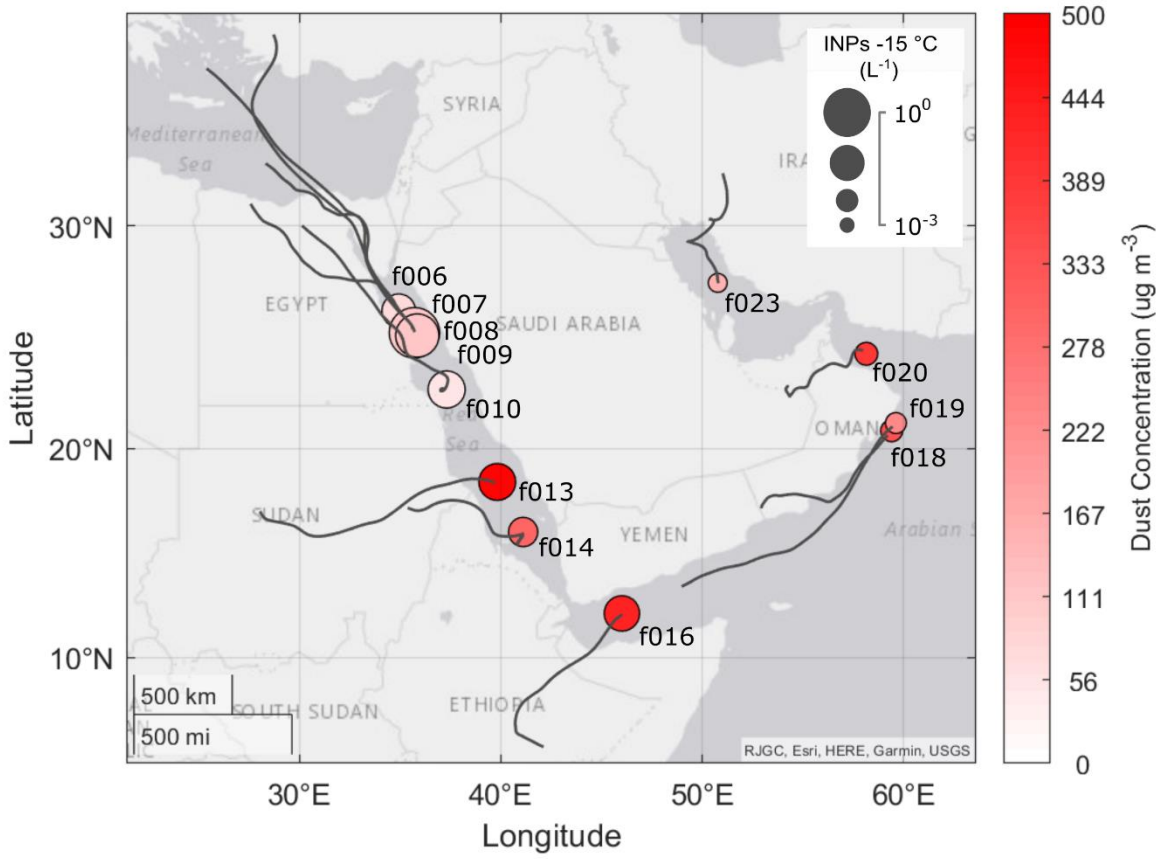

Figure S9

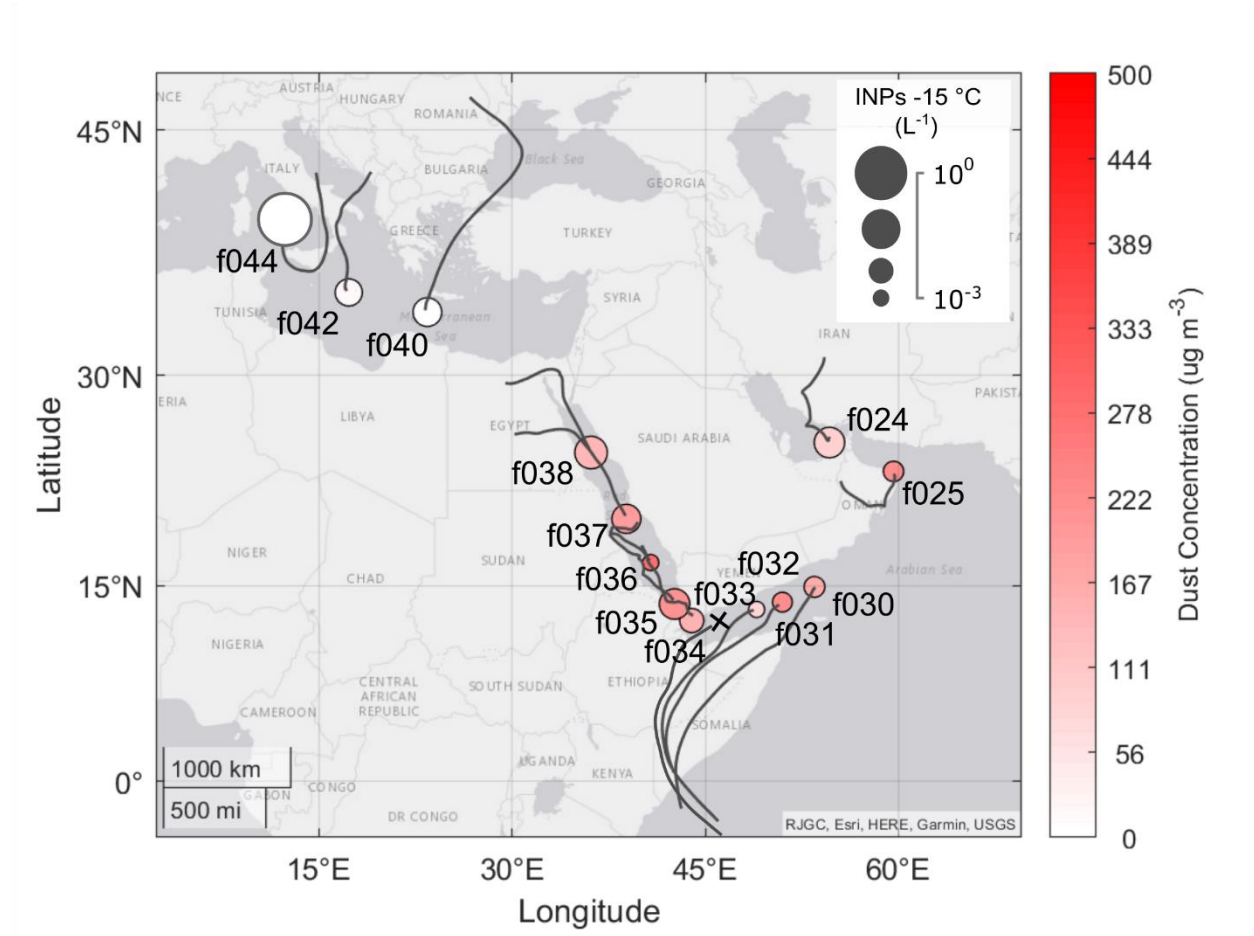

Figure S10

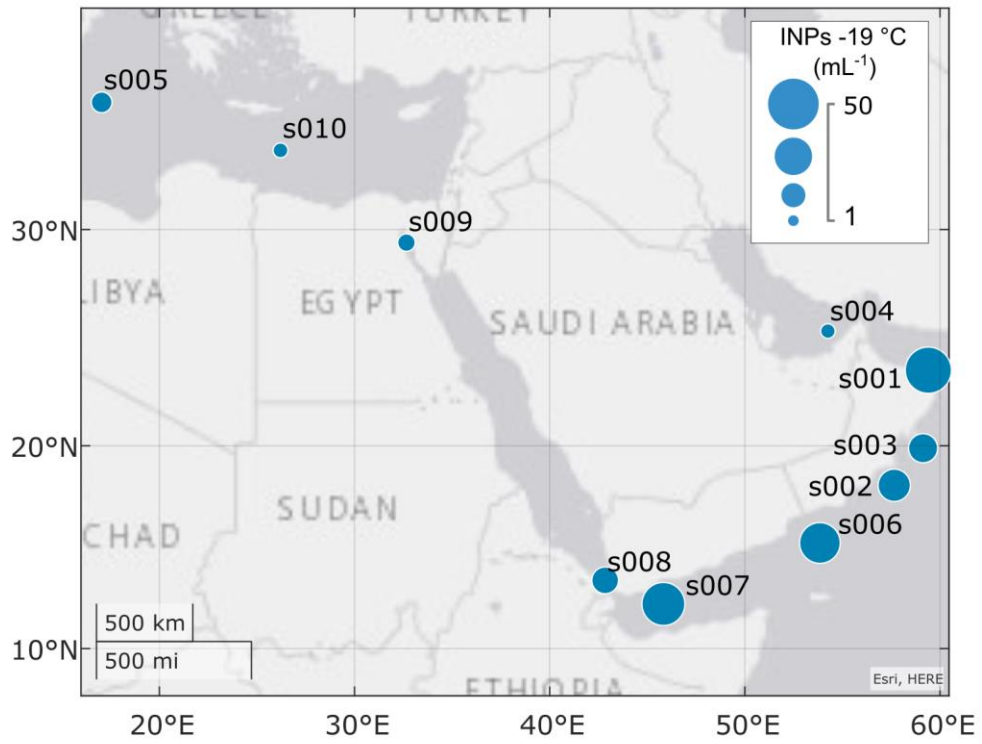

Figure S11

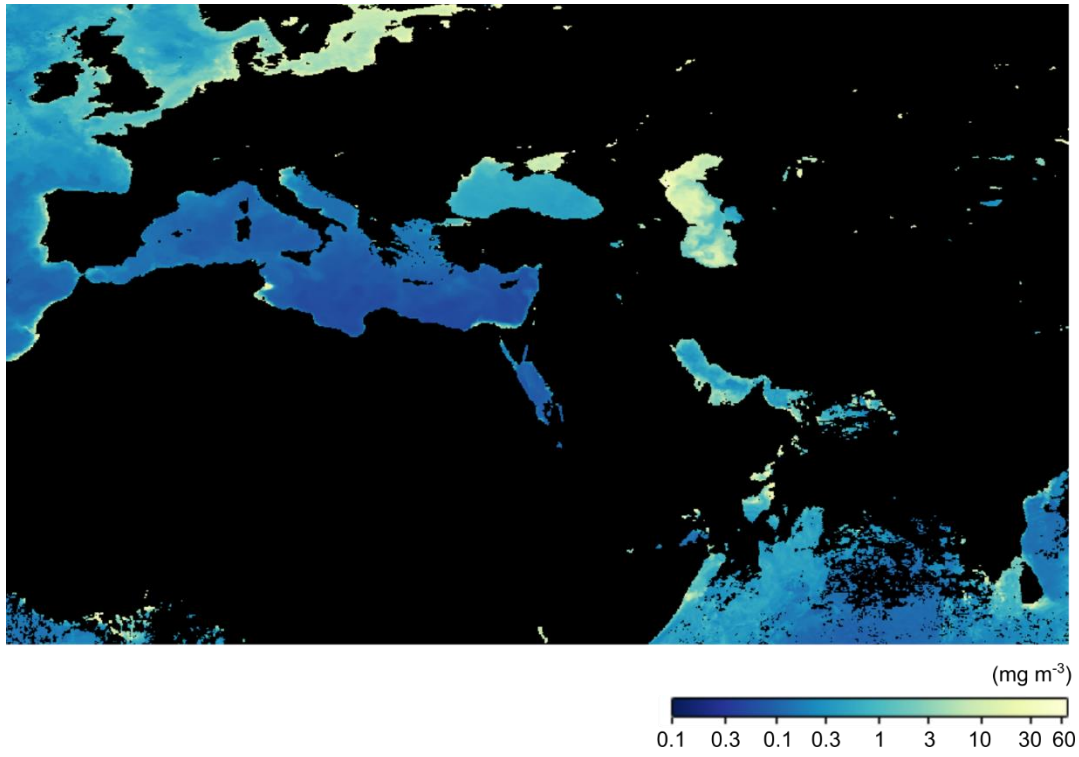

Figure S12

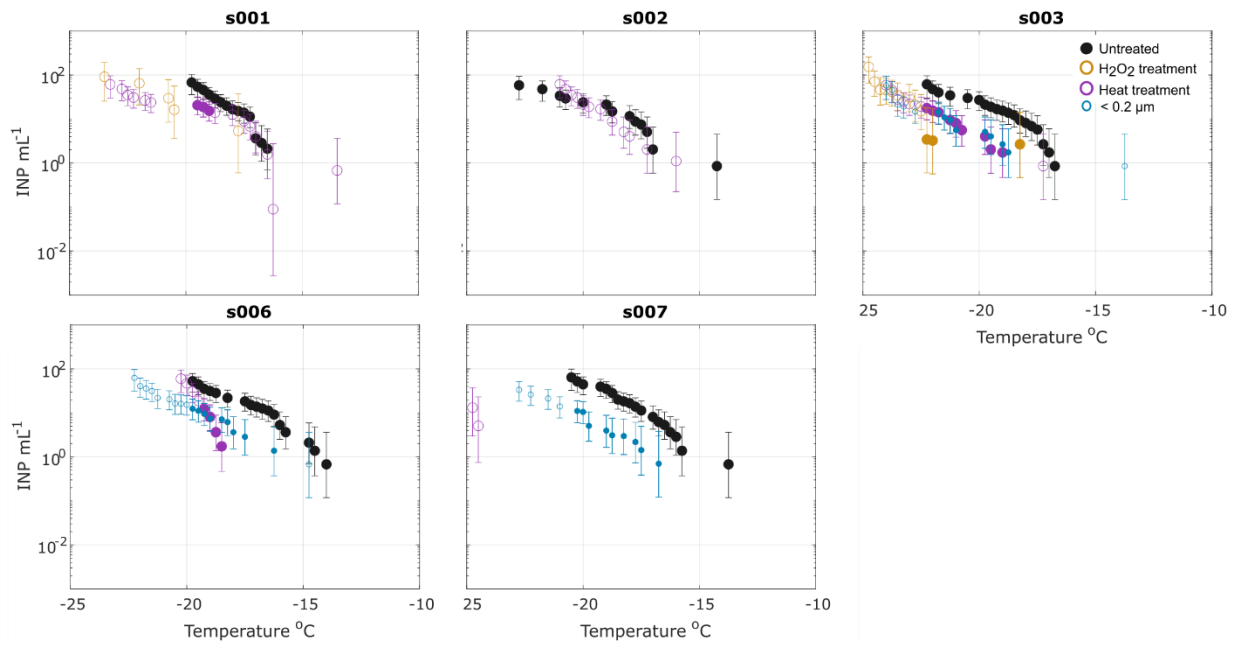

Supplement: Supplementary file 1 [file acp-2021-1101-supplement.pdf]
